# Supplementary material for: Postpartum Depression in COVID-19 Days: Longitudinal Study of Risk and Protective Factors
Source: MDPI journal article supplement (doi:10.3390/jcm11123488), 2022-06-17
Supplement: s1 [file s1]

## **Supplementary S1. QUESTIONNAIRE FORM**

Hello,

In the following survey you will find questions regarding your current birth experience and your postpartum status. The questionnaire is important in order for us to understand the consequences of childbirth and postpartum in times of the Coronavirus.

The participation in this research is voluntary. You may stop the survey at any given moment.

The privacy of your answers is guaranteed, and publications of study results will be performed anonymously with no personal details of participants.

The filling out of this survey will be considered as an informed consent for participating in this research.

Thank you in advance for your cooperation!

1. Please fill in the personal code you received from us \_\_\_\_\_

### **DEMOGRAPHICS**

1. Age
2. Gender (woman, other)
3. Country of birth (Israel, other)
4. Religion (Judaism, Islam, Christianity, not religious, other)
5. Marital status (single, in an unmarried relationship, married, divorced, separated, widowed, other)
6. Family type (heterosexual couple, homosexual couple, single parent, other)
7. Educational level (primary, high school graduate, first degree, second degree, third degree and up)

8. Average household income (the current average household income in Israel is 19,500 NIS) (much below average, below average, average, above average, much above average)
9. Have you gone through any traumatic events in the last 6 months? (e.g car accident, death of a loved one, etc')? if so, what was the traumatic event?
10. What is your profession?
11. Current occupational status (on unpaid leave due to the Coronavirus, on unpaid leave by choice, on maternity leave, working part-time, working full-time, other)
12. What is your partner's profession?
13. Current occupational status of partner (on unpaid leave due to the Coronavirus, on unpaid leave by choice, on birth leave, working part-time, working full-time, other)
14. Have you experienced any financial difficulties due to the Coronavirus?
15. How often do you worry about your financial status due to the Coronavirus? (not at all, almost never, sometimes, almost all the time, all the time)
16. Do you have any background medical conditions which put you at risk in case of being infected with the Coronavirus? (yes, no) if yes- what is your medical condition?
17. Do you have any physical, cognitive or mental (diagnosed or undiagnosed) disability, such as ADHD, depression, autism, deafness, chronic medical conditions? (yes, no), if yes- what is your disability?

### **COVID-19 RELATED LIFE EVENTS**

Here is a list of events that you may have encountered in the last few months following the outbreak of the COVID-19 pandemic. Please select at each event whether you experienced it or not.

|                                                                                                   | Have I experienced such an event | If so - how hard was it for me                         |
|---------------------------------------------------------------------------------------------------|----------------------------------|--------------------------------------------------------|
| 1. I was in contact with someone who was placed in quarantine (before being placed in quarantine) | Yes/ No                          | Not difficult/ Somewhat difficult/ Extremely difficult |
| 2. I was in contact with someone infected with COVID-19                                           | Yes/ No                          | Not difficult/ Somewhat difficult/ Extremely difficult |
| 3. Someone close to me (other than family member) was placed in quarantine                        | Yes/ No                          | Not difficult/ Somewhat difficult/ Extremely difficult |
| 4. Someone close to me (other than family member) got infected with COVID-19                      | Yes/ No                          | Not difficult/ Somewhat difficult/ Extremely difficult |
| 5. One of my relatives was placed in quarantine                                                   | Yes/ No                          | Not difficult/ Somewhat difficult/ Extremely difficult |
| 6. One of my relatives got infected with COVID-19                                                 | Yes/ No                          | Not difficult/ Somewhat difficult/ Extremely difficult |

|                                                                                              |         |                                                        |
|----------------------------------------------------------------------------------------------|---------|--------------------------------------------------------|
| 7. I was placed in quarantine                                                                | Yes/ No | Not difficult/ Somewhat difficult/ Extremely difficult |
| 8. I was infected with COVID-19                                                              | Yes/ No | Not difficult/ Somewhat difficult/ Extremely difficult |
| 9. Someone I know died as a result of COVID-19                                               | Yes/ No | Not difficult/ Somewhat difficult/ Extremely difficult |
| 10. One of my relatives died as a result of COVID-19                                         | Yes/ No | Not difficult/ Somewhat difficult/ Extremely difficult |
| 11. My children stayed at home as a result of the education system shutdown                  | Yes/ No | Not difficult/ Somewhat difficult/ Extremely difficult |
| 12. I refrained from meeting family members as a result of the Ministry of Health guidelines | Yes/ No | Not difficult/ Somewhat difficult/ Extremely difficult |
| 13. I refrained from meeting family members as a result of fear of infection                 | Yes/ No | Not difficult/ Somewhat difficult/ Extremely difficult |
| 14. Family members stopped helping me because of fear of infection                           | Yes/ No | Not difficult/ Somewhat difficult/ Extremely difficult |

### **FEAR OF COVID-19**

How much do you agree with the following statements?

|                                                                                                           | Definitely<br>disagree | Disagree | Does not agree<br>and does not<br>deny | Agree | Definitely<br>agree |
|-----------------------------------------------------------------------------------------------------------|------------------------|----------|----------------------------------------|-------|---------------------|
| 1. I am most afraid of<br>COVID-19                                                                        |                        |          |                                        |       |                     |
| 2. It makes me<br>uncomfortable to think<br>about COVID-19                                                |                        |          |                                        |       |                     |
| 3. My hands become<br>clammy when I think<br>about COVID-19                                               |                        |          |                                        |       |                     |
| 4. I am afraid of losing my<br>life because of COVID-<br>19                                               |                        |          |                                        |       |                     |
| 5. When watching news<br>and stories about<br>COVID-19 on social<br>media, I become nervous<br>or anxious |                        |          |                                        |       |                     |
| 6. I cannot sleep because<br>I'm worrying about<br>getting COVID-19                                       |                        |          |                                        |       |                     |

|                                                                     |  |  |  |  |  |
|---------------------------------------------------------------------|--|--|--|--|--|
| 7. My heart races or palpitates when I think about getting COVID-19 |  |  |  |  |  |
|---------------------------------------------------------------------|--|--|--|--|--|

### **Edinburgh Postnatal Depression Scale (EPDS)**

Please enclose in each group the sentence that best describes your feelings in the past month, including today.

In the last past month:

1. I have been able to laugh and see the funny side of things
  - a. As much as I always could
  - b. Not quite as much now
  - c. Definitely not so much now
  - d. Not at all
  
2. I have looked forward with enjoyment to things
  - a. As much as I ever did
  - b. Rather less than I used to
  - c. Definitely less than I used to
  - d. Hardly at all
  
3. I have blamed myself unnecessarily when things went wrong
  - a. Yes, most of the time
  - b. Yes, some of the time
  - c. Not very often
  - d. No, never
  
4. I have been anxious or worried for no good reason
  - a. No, not at all

- b. Hardly ever
  - c. Yes, sometimes
  - d. Yes, very often
5. I have felt scared or panicky for no very good reason
- a. Yes, quite a lot
  - b. Yes, sometimes
  - c. No, not much
  - d. No, not at all
6. Things have been getting on top of me
- a. Yes, most of the time I haven't been able to cope at all.
  - b. Yes, sometimes I haven't been coping as well as usual
  - c. No, most of the time I have coped quite well.
  - d. No, I have been coping as well as ever.
7. I have been so unhappy that I have had difficulty sleeping
- a. Yes, most of the time
  - b. Yes, sometimes
  - c. Not very often
  - d. No, not at all
8. I have felt sad or miserable
- a. Yes, most of the time
  - b. Yes, quite often
  - c. Not very often
  - d. No, not at all
9. I have been so unhappy that I have been crying

- a. Yes, most of the time
- b. Yes, quite often
- c. Only occasionally
- d. No, never

10. The thought of harming myself has occurred to me

- a. Yes, quite often
- b. Sometimes
- c. Hardly ever
- d. Never

### **The State-Trait Anxiety Inventory - STAI**

|                | Not at all | A little | Somewhat | Very much so |
|----------------|------------|----------|----------|--------------|
| I feel calm    | 1          | 2        | 3        | 4            |
| I feel tense   | 1          | 2        | 3        | 4            |
| I feel upset   | 1          | 2        | 3        | 4            |
| I am relaxed   | 1          | 2        | 3        | 4            |
| I feel content | 1          | 2        | 3        | 4            |
| I am worried   | 1          | 2        | 3        | 4            |

### **MSPSS**

|   |                       | Very<br>strongly<br>disagree | Strongly<br>Disagree | Mildly<br>Disagree | Neutral | Mildly<br>Agree | Strongly<br>Agree | Very<br>Strongly<br>Agree |
|---|-----------------------|------------------------------|----------------------|--------------------|---------|-----------------|-------------------|---------------------------|
| 1 | There is a<br>special | 1                            | 2                    | 3                  | 4       | 5               | 6                 | 7                         |



|   |                                                                                 |   |   |   |   |   |   |   |
|---|---------------------------------------------------------------------------------|---|---|---|---|---|---|---|
|   | person who<br>is around<br>when I am<br>in need                                 |   |   |   |   |   |   |   |
| 2 | There is a<br>special<br>person with<br>whom I can<br>share joys<br>and sorrows | 1 | 2 | 3 | 4 | 5 | 6 | 7 |
| 3 | My family<br>really tries<br>to help me                                         | 1 | 2 | 3 | 4 | 5 | 6 | 7 |
| 4 | I get the<br>emotional<br>help &<br>support I<br>need from<br>my family         | 1 | 2 | 3 | 4 | 5 | 6 | 7 |
| 5 | I have a<br>special<br>person who<br>is a real<br>source of<br>comfort to<br>me | 1 | 2 | 3 | 4 | 5 | 6 | 7 |
| 6 | My friends<br>really try to<br>help me                                          | 1 | 2 | 3 | 4 | 5 | 6 | 7 |

|    |                                                                                 |   |   |   |   |   |   |   |
|----|---------------------------------------------------------------------------------|---|---|---|---|---|---|---|
| 7  | I can count<br>on my<br>friends<br>when things<br>go wrong                      | 1 | 2 | 3 | 4 | 5 | 6 | 7 |
| 8  | I can talk<br>about my<br>problems<br>with my<br>family                         | 1 | 2 | 3 | 4 | 5 | 6 | 7 |
| 9  | I have<br>friends with<br>whom I can<br>share my<br>joys and<br>sorrows         | 1 | 2 | 3 | 4 | 5 | 6 | 7 |
| 10 | There is a<br>special<br>person in<br>my life who<br>cares about<br>my feelings | 1 | 2 | 3 | 4 | 5 | 6 | 7 |
| 11 | My family<br>is willing to<br>help me<br>make<br>decisions                      | 1 | 2 | 3 | 4 | 5 | 6 | 7 |
| 12 | I can talk<br>about my                                                          | 1 | 2 | 3 | 4 | 5 | 6 | 7 |

|  |                                |  |  |  |  |  |  |  |
|--|--------------------------------|--|--|--|--|--|--|--|
|  | problems<br>with my<br>friends |  |  |  |  |  |  |  |
|--|--------------------------------|--|--|--|--|--|--|--|
